# Supplementary material for: Medulloblastoma cancer stem cells: molecular signatures and therapeutic targets
Source: HighWire-hosted journal article supplement (doi:10.1136/jclinpath-2019-206246), 2020-02-07

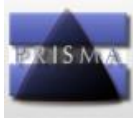

**Appendix S2. PRISMA 2009 Flow Diagram:  
Medulloblastoma Cancer Stem Cells: Molecular Signatures and  
Therapeutic Targets**

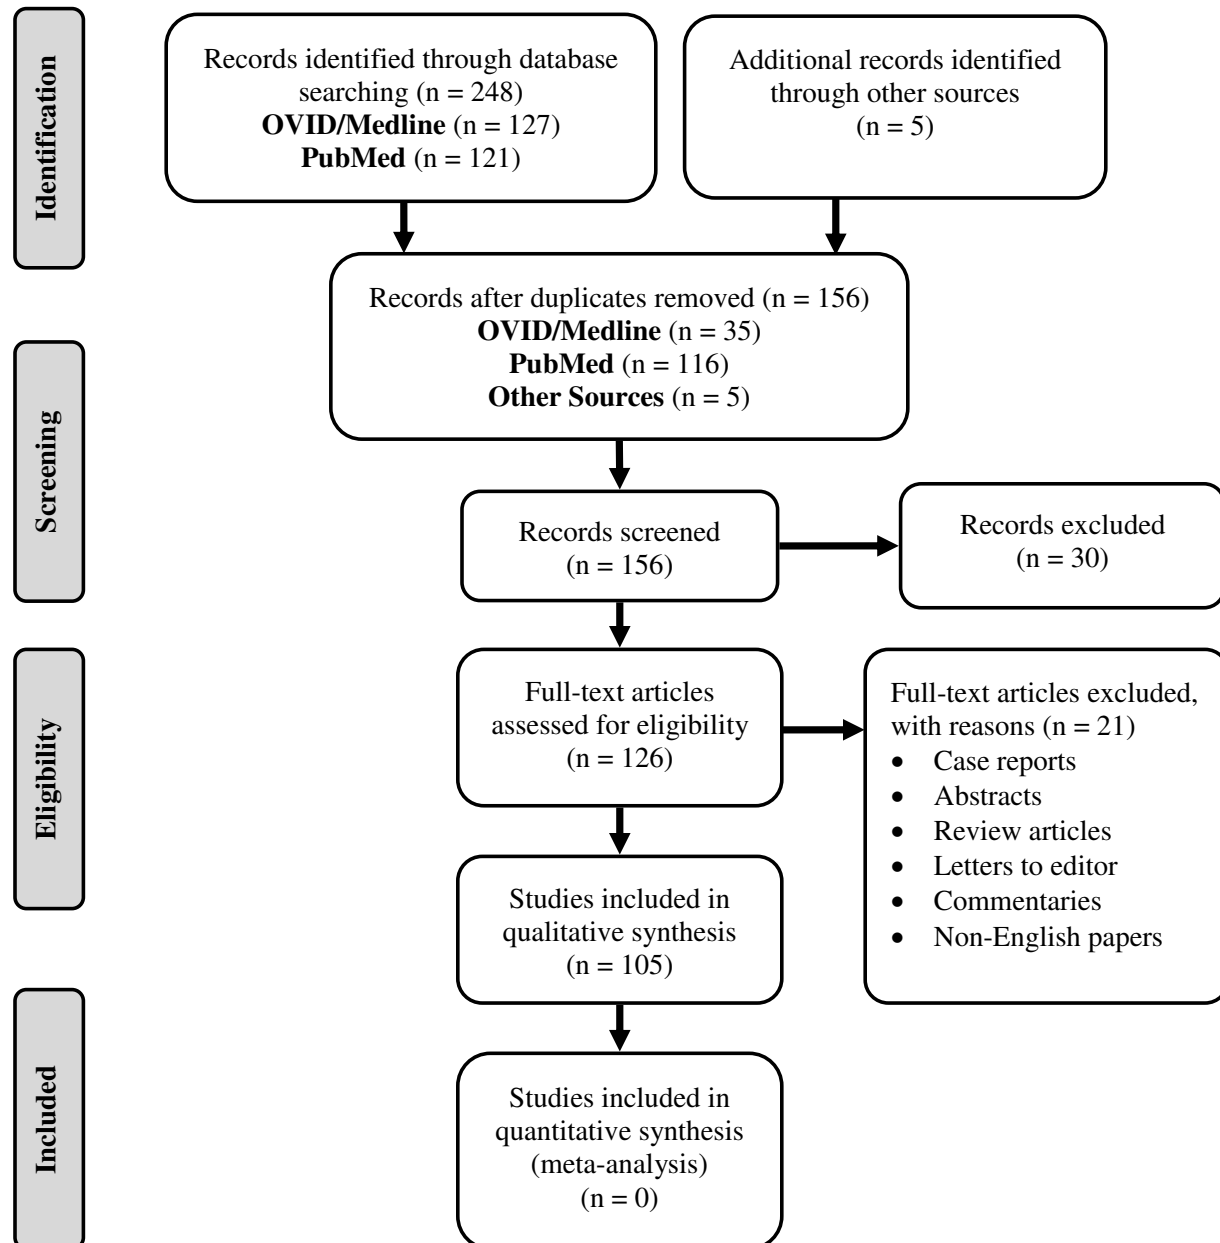

Supplement: jclinpath-2019-206246supp002_data_supplement.pdf [file jclinpath-2019-206246supp002_data_supplement.pdf]
